# Supplementary material
Source: publisher figshare collection journal article supplement (https://acs.figshare.com/ndownloader/files/15350819)
Supplement: Supplementary file 1 [file 15350819]

---

# **Cu-Doped Carbon Dots as Catalysts for the Chemiluminescence Detection of Glucose**

Yan Duan,<sup>†,1</sup> Yijun Huang,<sup>†,‡,1</sup> Shengyu Chen,<sup>†</sup> Weiyuan Zuo,<sup>†</sup> Bingfang Shi<sup>†,\*</sup>

<sup>†</sup> Key Laboratory of Regional Ecological Environment Analysis and Pollution Control of West Guangxi, College of Chemistry and Environmental Engineering, Baise University, Baise 533000, China

<sup>‡</sup> State Key Laboratory Breeding Base of Nonferrous Metals and Specific Materials Processing, College of Materials Science and Engineering, Guilin University of Technology, Guilin 541004, China

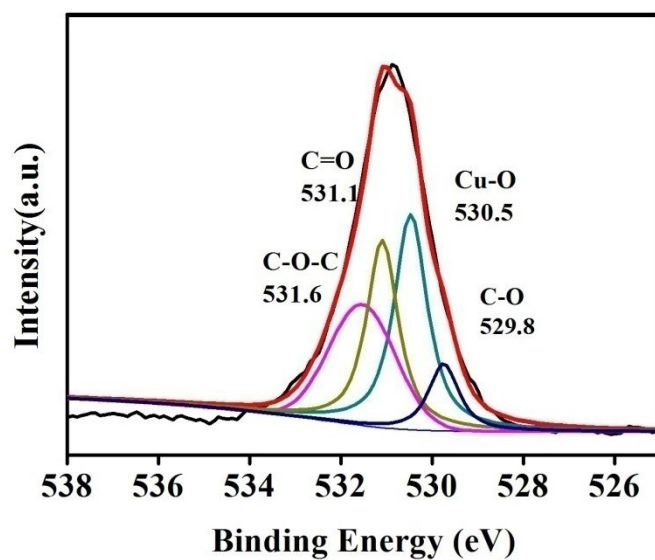

**Figure S1.** XPS High-Resolution Survey of o1s of Cu-CDs.

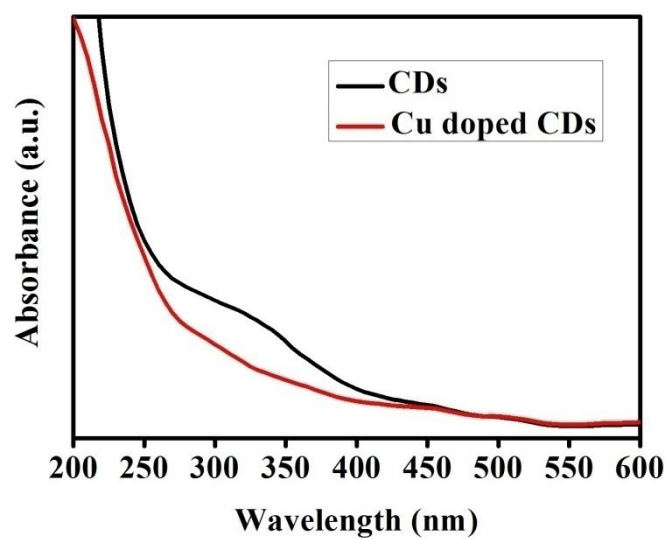

**Figure S2.** The UV-vis Spectrum of the As-prepared the Bare CDs and Cu-CDs.

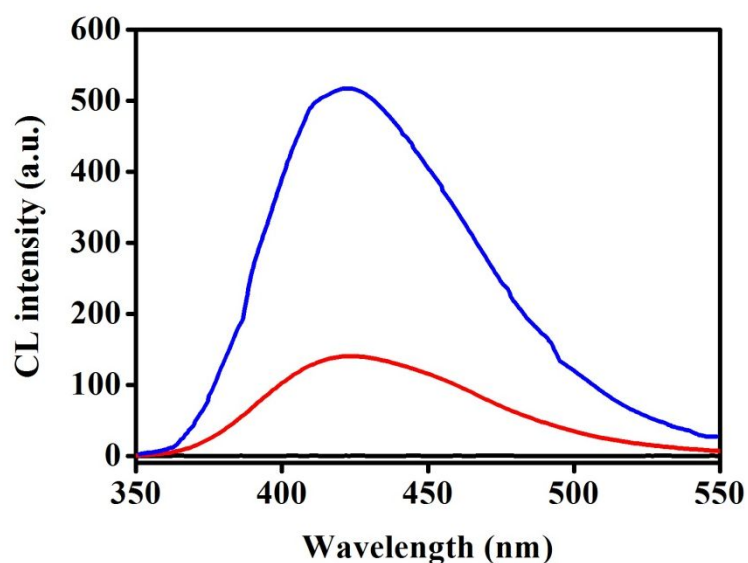

**Figure S3.** Feasibility of CL Biosensor Based Cu-CDs. Black Line:  $\text{H}_2\text{O}_2$ +Luminol; Red Line: Luminol+Cu-CDs; Blue Line:  $\text{H}_2\text{O}_2$ +Luminol+Cu-CDs. The Concentration of Luminol, Cu-CDs, and  $\text{H}_2\text{O}_2$  was 0.75 mM,  $1.0 \text{ mg} \cdot \text{mL}^{-1}$ , 1125  $\mu\text{M}$ , Respectively.

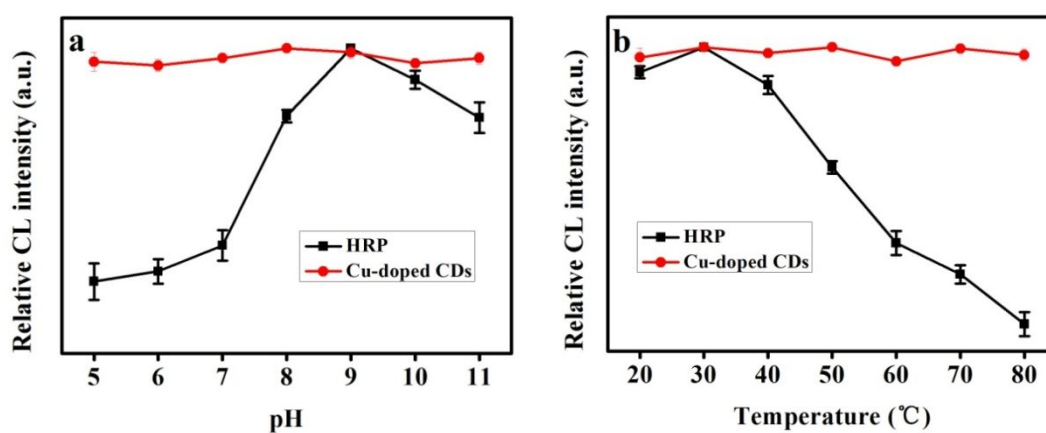

**Figure S4.** The Performance of the Catalytic Ability of HRP and Cu-CDs.

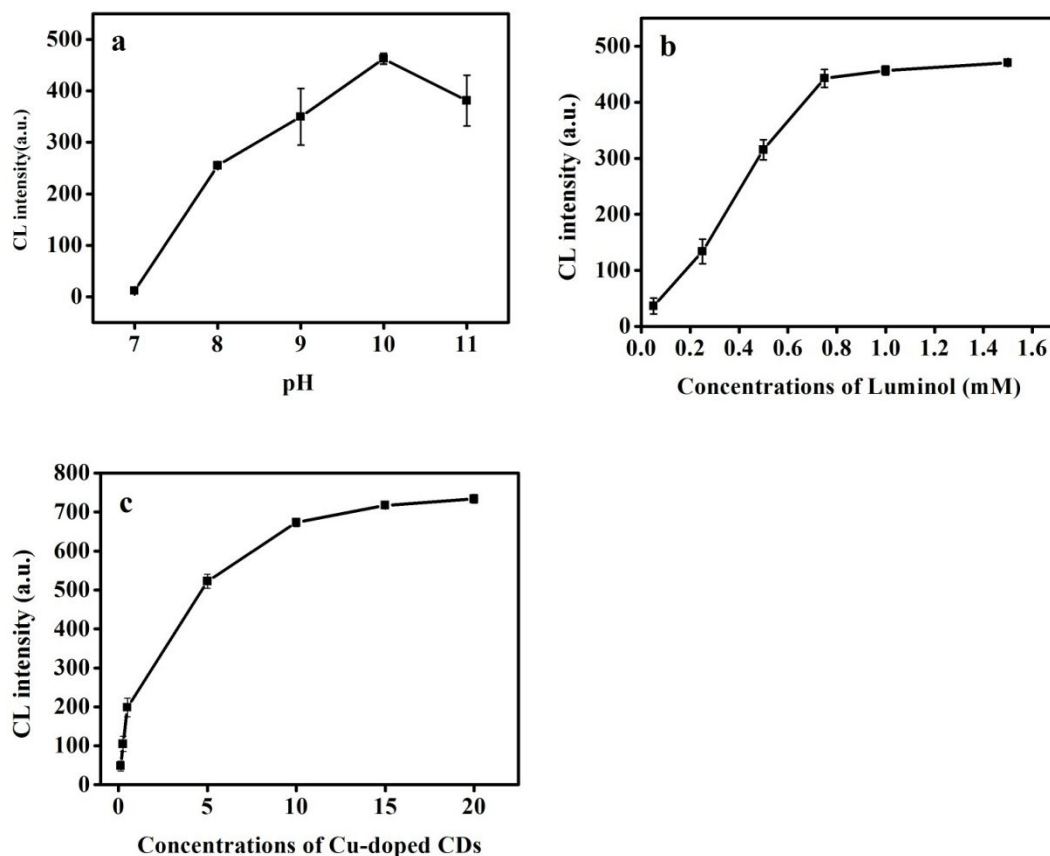

**Figure S5.** Effect of pH (a), Luminal (b) and Cu-CDs Concentration (c) on the Proposed CL Biosensor for the  $H_2O_2$  Detection.

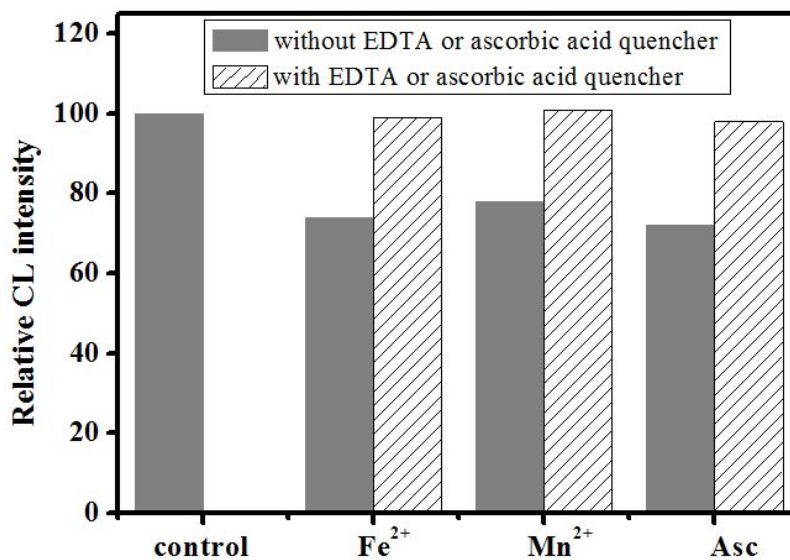

**Fig. S6** CL intensity of the proposed CL system in the absence and in the presence of EDTA or 4-hydroxy-2,2,6,6-tetramethyl-N-oxygen-piperidine. Experimental conditions:  $Fe^{2+}$ ,  $Mn^{2+}$ , and ascorbic acid (Asc)  $40 \mu M$ ; EDTA and 4-hydroxy-2,2,6,6-tetramethyl-N-oxygen-piperidine  $2.5 mM$ .

**Table S1.** Measure Value and Recoveries of the Determination of Glucose in Human Serum Samples Using the Proposed CL Sensor.

| Sample  | Measure value<br>(mmol · L <sup>-1</sup> ) | Added<br>(mmol · L <sup>-1</sup> ) | Found<br>(mmol · L <sup>-1</sup> ) | Recovery<br>(%) | RSD<br>(%) |
|---------|--------------------------------------------|------------------------------------|------------------------------------|-----------------|------------|
| serum 1 | 4.80                                       | 2.59                               | 7.54                               | 105.8           | 5.41       |
|         | 4.80                                       | 4.61                               | 9.37                               | 99.1            | 8.16       |
| serum 2 | 7.66                                       | 3.82                               | 11.51                              | 100.8           | 2.83       |
|         | 7.66                                       | 7.26                               | 15.46                              | 107.4           | 6.57       |
| serum 3 | 8.07                                       | 4.15                               | 11.69                              | 87.2            | 4.92       |
|         | 8.07                                       | 6.04                               | 14.85                              | 112.2           | 6.55       |
